# Supplementary material
Source: publisher figshare collection journal article supplement (https://gsajournals.figshare.com/ndownloader/files/13277084)
Supplement: Supplementary file 1 [file 13277084]

Supplementary Table S1. *C. elegans* mutant strains assayed for sensitivity to ectopic sperm migration after mating with males of *C. elegans* or *C. nigoni*.

| Gene | Strain genotype | Strain | Phenotype group | Protein | Localization | Phenotype notes [REFERENCES] |
| --- | --- | --- | --- | --- | --- | --- |
| wt | wildtype | N2 | wildtype | n/a | n/a | n/a |
| *ceh-18* | *ceh-18(mg57) X* | GR1034 | attraction + ovulation | homeodomain transcription factor | broadly expressed | required for normal sheath cell development and contractions, ovulation, sperm sensing; loss induces endomitosis [1, 2] |
| *ceh-18; fog-2* | *ceh-18(mg57) X; fog-2(q71) V* | DG1604 | attraction + ovulation | homeodomain transcription factor | broadly expressed | required for normal sheath cell development and contractions, ovulation, sperm sensing; loss induces endomitosis [1-4] |
| *daf-2* | *daf-2(e1370) III* | CB1370 | attraction + ovulation | insulin/IGF receptor tyrosine kinase | broadly expressed | required for normal sperm migration toward oocytes, spermathecal valve constriction [5-7] |
| *dpl-1* | *dpl-1(n3316) unc-4(e120)/mnC1 [dpy-10(e128) unc-52(e444) II]* | MT9940 | ovulation | DP transcriptional regulator | broadly expressed | required for normal oogenesis, ovulation; loss induces endomitosis [8-10] |
| *efl-1* | *efl-1(n3639) V /+ ; lin-15A(n767) X* | MT11691 | ovulation | E2F transcription factor | gonad | required for normal oogenesis, ovulation; loss induces endomitosis [9] |
| *egg-1* | *egg-1(tm1071) III* | AD186 | attraction + fertilization + ovulation | LDL-receptor | oocyte membrane | required for normal gamete interaction and fertilization, sperm attraction/retention, ovulation [11] |
| *fat-1* | *fat-1(wa9) IV* | BX24 | attraction | omega-3 fatty acyl desaturase | broadly expressed | PUFA synthesis [6, 12] |
| *fat-1,4* | *fat-4(wa14) fat-1(wa9) IV* | BX52 | attraction | omega-3 and delta-5 desaturases | broadly expressed | [6, 12] |
| *fat-2* | *fat-2(wa17) IV* | BX26 | attraction + ovulation | delta-12 fatty acyl desaturase | broadly expressed | C18/C20 PUFA synthesis; required for normal sperm migration toward oocytes, spermathecal valve constriction [5-7, 12] |
| *fat-3* | *fat-3(wa22) IV* | BX30 | attraction | delta-6 fatty acid desaturase | broadly expressed | delta-6/C20 fatty acid synthesis [6, 12] |
| *fat-4* | *fat-4(wa14) IV* | BX17 | attraction | delta-5 fatty acid desaturase | broadly expressed | PUFA precursor synthesis [6, 12] |
| *gst-4* | *gst-4&msp-38(ok2358) IV* | RB1823 | attraction + ovulation | GSH-dependent prostaglandin D synthase | broadly expressed | required for normal sperm migration toward oocytes [5, 7] |
| *inx-14* | *inx-14(ag17) I* | AU98 | attraction + ovulation | innexin gap junction channel | broadly expressed | required for normal sperm migration toward oocytes, oocyte maturation [13] |
| *ipp-5* | *ipp-5(sy605) X* | PS3653 | ovulation | inositol 5-phosphatase | distal spermatheca, proximal sheath cells | required for normal spermathecal contractions [14] |
| *itr-1(sa73)* | *itr-1(sa73) IV* | JT73 | ovulation | inositol (1,4,5) triphosphate receptor | broadly expressed | required for normal ovulation, spermatheca and sheath cell contractions [14-16] |
| *itr-1(sy327)* | *itr-1(sy327) unc-24(e138) IV* | PS2368 | ovulation | inositol (1,4,5) triphosphate receptor | broadly expressed | required for normal ovulation, spermatheca and sheath cell contractions [16, 17] |
| *oma-1,2* | *oma-1(zu405te33)/nT1 [unc-?(n754) let-?] IV; oma-2(te51)/nT1 V* | TX183 | ovulation | TIS11 zinc finger protein | broadly expressed | required for normal oocyte maturation, ovulation; no obvious single-mutant phenotypes [18, 19] |
| *plc-1* | *plc-1(rx1) X; kfEx2* | PS4112 | ovulation | phospholipase C | broadly expressed | required for normal ovulation, spermathecal contractions; loss induces endomitosis [14, 16, 20] |
| *rme-2* | *rme-2(b1008)IV* | DH1390 | attraction + ovulation | LDL-receptor | near oocyte membrane | required for normal yolk uptake in oogenesis, sperm movement, ovulation, spermathecal valve constriction; loss induces endomitosis [6, 7, 10] |
| *spe-41* | *spe-41(sy693) III; him-5(e1490) V* | PS4330 | fertilization | Ca+ TRPC channel | sperm membrane | required for fertilization upon gamete contact [21, 22] |
| *spe-42* | *spe-42(tn1231) V/nT1 [unc-?(n754) let-? qIs50] (IV;V)* | SL1138 | fertilization | novel 7-pass transmembrane protein | sperm membrane | required for fertilization upon gamete contact [22] |
| *spe-9* | *spe-9(hc88) I* | BA671 | fertilization | EGF repeat-containing protein | near sperm membrane | required for fertilization upon gamete contact [19, 23, 24] |
| *spv-1* | *spv-1(ok1498) II* | RB1353 | ovulation | F-BAR/RhoGAP protein | membranes of neurons, spermatheca, hypodermis | required for normal spermathecal contractions [25, 26] |
| *vab-1* | *vab-1(dx31) II* | CZ337 | ovulation | ephrin receptor | neurons, oocytes, sheath cells | required for normal sheath cell contractions; receptor for MSP [3] |
| *vab-1; fog-2* | *vab-1(dx31)/mIn1 [dpy-10(e128) mIs14] II; fog-2(q71) V* | DG1612 | ovulation | ephrin receptor | neurons, oocytes, sheath cells | required for normal sheath cell contractions; receptor for MSP [3, 4, 27] |

Supplementary literature cited

1. Rose KL, Winfrey VP, Hoffman LH, Hall DH, Furuta T, Greenstein D: The POU gene *ceh-18* promotes gonadal sheath cell differentiation and function required for meiotic maturation and ovulation in *Caenorhabditis elegans*. *Developmental Biology* 1997, 192(1):59-77.

2. Greenstein D, Hird S, Plasterk R, Andachi Y, Kohara Y, Wang B, Finney M, Ruvkun G: Targeted mutations in the *Caenorhabditis elegans* POU homeo box gene *ceh-18* cause defects in oocyte cell cycle arrest, gonad migration, and epidermal differentiation. *Genes & Development* 1994, 8(16):1935-1948.

3. Miller MA, Ruest PJ, Kosinski M, Hanks SK, Greenstein D: An Eph receptor sperm-sensing control mechanism for oocyte meiotic maturation in *Caenorhabditis elegans*. *Genes & Development* 2003, 17(2):187-200.

4. Schedl T, Kimble J: *fog-2*, a germ-line-specific sex determination gene required for hermaphrodite spermatogenesis in *Caenorhabditis elegans*. *Genetics* 1988, 119(1):43-61.

5. Edmonds JW, Prasain JK, Dorand D, Yang Y, Hoang HD, Vibbert J, Kubagawa HM, Miller MA: Insulin/FOXO signaling regulates ovarian prostaglandins critical for reproduction. *Developmental Cell* 2010, 19(6):858-871.

6. Kubagawa HM, Watts JL, Corrigan C, Edmonds JW, Sztul E: Oocyte signals derived from polyunsaturated fatty acids control sperm recruitment *in vivo*. *Nature Cell Biology* 2006, 8(10):1143-1148.

7. Grant B, Hirsh D: Receptor-mediated endocytosis in the *Caenorhabditis elegans* oocyte. *Molecular Biology of the Cell* 1999, 10(12):4311-4326.

8. Chi W, Reinke V: Promotion of oogenesis and embryogenesis in the *C. elegans* gonad by EFL-1/DPL-1 (E2F) does not require LIN-35 (pRB). *Development* 2006, 133(16):3147-3157.

9. Ceol CJ, Horvitz HR: *dpl-1* DP and *efl-1* E2F act with *lin-35* Rb to antagonize Ras signaling in *C. elegans* vulval development. *Molecular Cell* 2001, 7(3):461-473.

10. Chi W, Reinke V: DPL-1 (DP) acts in the germ line to coordinate ovulation and fertilization in *C. elegans*. *Mechanisms of Development* 2009, 126(5):406-416.

11. Kadandale P, Stewart-Michaelis A, Gordon S, Rubin J, Klancer R, Schweinsberg P, Grant BD, Singson A: The egg surface LDL receptor repeat-containing proteins EGG-1 and EGG-2 are required for fertilization in *Caenorhabditis elegans*. *Current Biology* 2005, 15(24):2222-2229.

12. Watts JL, Browse J: Genetic dissection of polyunsaturated fatty acid synthesis in *Caenorhabditis elegans*. *Proceedings of the National Academy of Sciences* 2002, 99(9):5854-5859.

13. Edmonds JW, McKinney SL, Prasain JK, Miller MA: The gap junctional protein INX-14 functions in oocyte precursors to promote *C. elegans* sperm guidance. *Developmental Biology* 2011, 359(1):47-58.

14. Bui YK, Sternberg PW: *Caenorhabditis elegans* inositol 5-phosphatase homolog negatively regulates inositol 1, 4, 5-triphosphate signaling in ovulation. *Molecular Biology of the Cell* 2002, 13(5):1641-1651.

15. Iwasaki K, Liu D, Thomas JH: Genes that control a temperature-compensated ultradian clock in *Caenorhabditis elegans*. *Proceedings of the National Academy of Sciences* 1995, 92(22):10317-10321.

16. Yin X, Gower NJ, Baylis HA, Strange K: Inositol 1, 4, 5-trisphosphate signaling regulates rhythmic contractile activity of myoepithelial sheath cells in *Caenorhabditis elegans*. *Molecular Biology of the Cell* 2004, 15(8):3938-3949.

17. Clandinin TR, DeModena JA, Sternberg PW: Inositol trisphosphate mediates a RAS-independent response to LET-23 receptor tyrosine kinase activation in *C. elegans*. *Cell* 1998, 92(4):523-533.

18. Detwiler MR, Reuben M, Li X, Rogers E, Lin R: Two zinc finger proteins, OMA-1 and OMA-2, are redundantly required for oocyte maturation in *C. elegans*. *Developmental Cell* 2001, 1(2):187-199.

19. Singson A, Mercer KB, L'Hernault SW: The *C. elegans spe-9* gene encodes a sperm transmembrane protein that contains EGF-like repeats and is required for fertilization. *Cell* 1998, 93(1):71-79.

20. Kariya K-i, Bui YK, Gao X, Sternberg PW, Kataoka T: Phospholipase Cɛ regulates ovulation in *Caenorhabditis elegans*. *Developmental Biology* 2004, 274(1):201-210.

21. Xu X-ZS, Sternberg PW: A *C. elegans* sperm TRP protein required for sperm-egg interactions during fertilization. *Cell* 2003, 114(3):285-297.

22. Kroft TL, Gleason EJ, L'Hernault SW: The *spe-42* gene is required for sperm–egg interactions during *C. elegans* fertilization and encodes a sperm-specific transmembrane protein. *Developmental Biology* 2005, 286(1):169-181.

23. L'Hernault SW, Shakes DC, Ward S: Developmental genetics of chromosome I spermatogenesis-defective mutants in the nematode *Caenorhabditis elegans*. *Genetics* 1988, 120(2):435-452.

24. Zannoni S, L'Hernault SW, Singson AW: Dynamic localization of SPE-9 in sperm: a protein required for sperm-oocyte interactions in *Caenorhabditis elegans*. *BMC Developmental Biology* 2003, 3(1):10.

25. Cram EJ: Mechanotransduction: Feeling the squeeze in the *C. elegans* reproductive system. *Current Biology* 2015, 25(2):R74-R75.

26. Tan PY, Zaidel-Bar R: Transient membrane localization of SPV-1 drives cyclical actomyosin contractions in the *C. elegans* spermatheca. *Current Biology* 2015, 25(2):141-151.

27. Page BD, Guedes S, Waring D, Priess JR: The *C. elegans* E2F-and DP-related proteins are required for embryonic asymmetry and negatively regulate Ras/MAPK signaling. *Molecular Cell* 2001, 7(3):451-460.
